# Supplementary material for: FANCD2 inhibits ferroptosis by regulating the JAK2/STAT3 pathway in osteosarcoma
Source: Springer Nature journal article supplement (doi:10.1186/s12885-023-10626-7), 2023-02-22
Supplement: MOESM1 [file 24054964]

**Figure1 FANCD2  
(166 KDa)**

180 KDa  
130 KDa

hFOB1.19  
MG-63  
U2OS

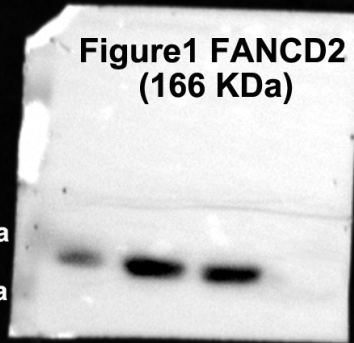

Figure1 GAPDH (37KDa)

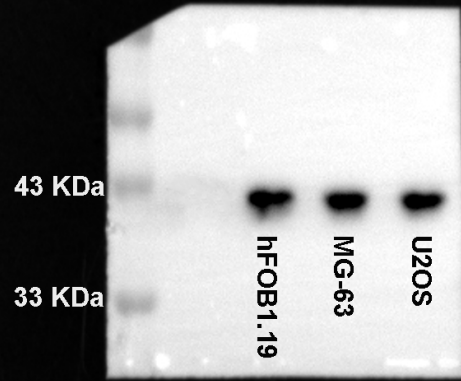

Figure2 FANCD2 MG-63

166 KDa

180 KDa

130 KDa

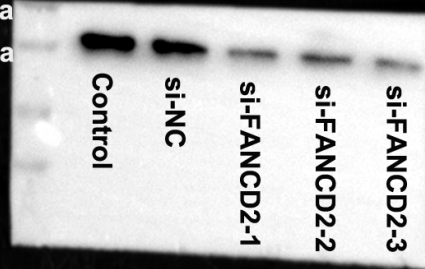

**Figure2 FANCD2 U2OS  
(166 KDa)**

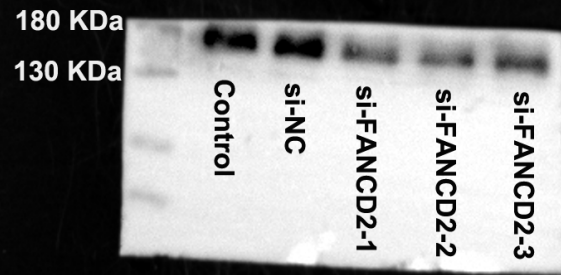

**Figure2 GAPDH MG-63  
(37 KDa)**

43 KDa  
33KDa

Control  
si-NC  
si-FANCD2-1  
si-FANCD2-2  
si-FANCD2-3

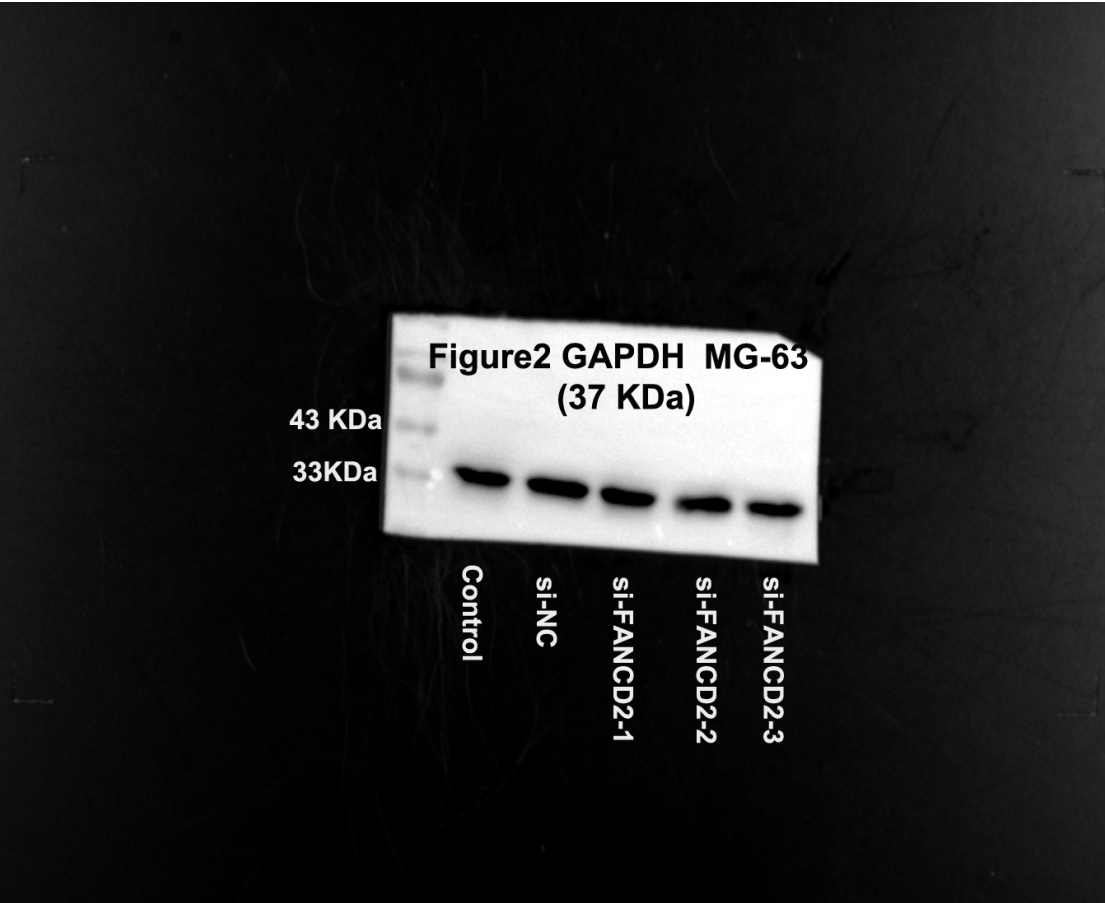

Figure2 GAPDH U2OS ( 37KDa)

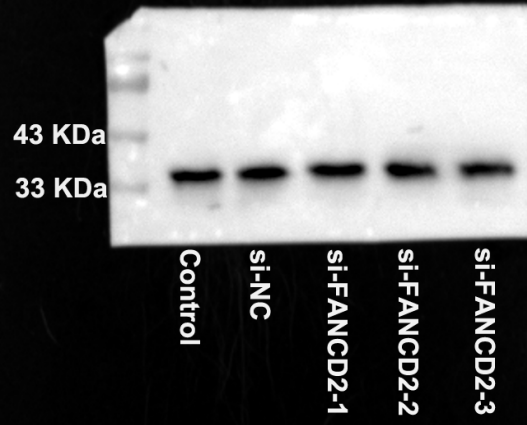

Figure4 GAPDH (37KDa)

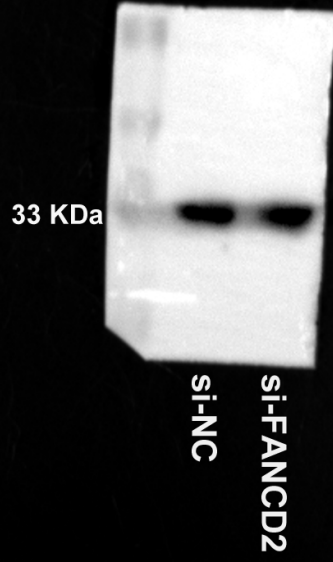

Figure4 JAK2 (131KDa)

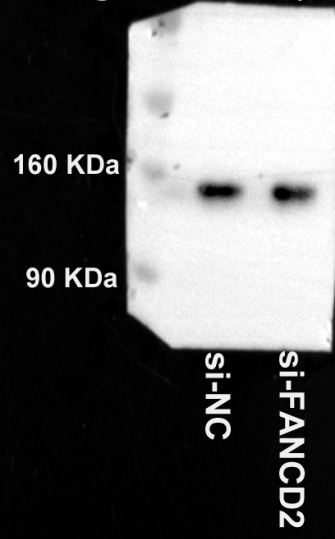



Figure4 p-JAK2 (131KDa)

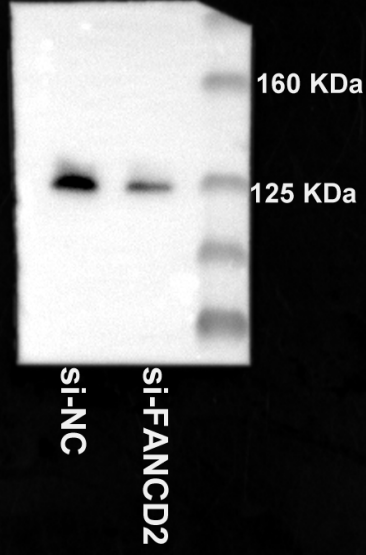

Figure4 p-STAT3(88 KDa)

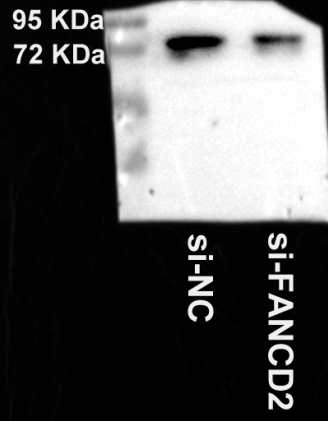

Figure4 STAT3 (88KDa)

72KDa

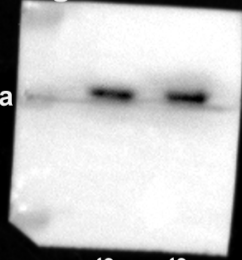

si-FANCD2  
si-NC
